# Supplementary material
Source: publisher figshare collection journal article supplement (https://karger.figshare.com/ndownloader/files/28376904)
Supplement: Supplementary file 1 [file 28376904]

| **Author / title** | **inclusion** | **comment** | **number of patient / contacts** | **uni or bilateral** | **prospective or retrospective** | **timing compared to surgery (months)** | **contralateral stimulation** | **methods** | **motor outcome** | **medication during assessment** | **reference** | **STN boundaries relative to contact i.e Analysis of anatomical location** | **automatized or manual** | **normalisation** | **if Atlas, registration (rigid/elastic)** | **electrode localization** | **automatized or manual** | **comparison** | **best stimulation location** |
| --- | --- | --- | --- | --- | --- | --- | --- | --- | --- | --- | --- | --- | --- | --- | --- | --- | --- | --- | --- |
| **Yokoyama et al. Stereotact Funct Neurosurg. 2001** | 0 | early assessment, insufficient number of patients, bilateral UPDRS-III sub-score with bilateral stimulation | 10 / 46 | bilateral and unilateral | prospective | 7-10 days | not clearly mentioned | identification of contact number associated with the best improvement in motor sub-scores | bilateral UDPRS-III sub-score | OFF medication | compared to OFF stimulation OFF medication performed post operatively, just before ON stimulation OFF medication assessment | MER | manual | position of contacts and MER defined dorsal and ventral STN borders in relation to ACPC plan individually | N/A | X rays | manual | comparison of each contact number with OFF medication, Fisher exact test | **dorsal border of the STN** |
| **Lanotte et al. J Neurol Neurosurg Psychiatry. 2002** | 0 | lead localisation not described long follow up, partly lateralised assessment, ipsilateral stimulation turned OFF, no normalisation of coordinates but individual variability taken into account when describing the vertical position of the contact, expressed in relation to STN recording area upper limit and centre, | 14 / 28 | bilateral | prospective | 3 months and 1 year | switched OFF | identification of the contact used at follow up after testing every contact for rigidity at 3 months and 1 year | contralateral rigidity on UPDRS-III and total UPDRS-III | OFF medication | compared to OFF stimulation OFF medication performed post operatively, just before ON stimulation OFF medication assessment | MER | manual | position of contact relative to centre and limits or STN recording area was noted for each patient | N/A | not specified | manual | description / average contact location | **dorsal STN / white matter above** |
| **Yelnik et al. J Neurosurg. 2003** | 0 | Insufficient number of patients, variable assessment time (2-27 months), ipsilateral stimulation not specified, linear co-registration with an atlas using landmarks with independent linear scaling factors for STN visualisation. For coordinates-based localisation, no correction mentioned | 10 / 40 | bilateral | prospective | 2-27 months, <6 months for 4/10 patients | not clearly mentioned, possibly OFF | location of active contact and test of active and distant contact acutely | UPDRS III and lateralised and axial sub-scores | OFF medication | post op OFF medication OFF stimulation and ON stimulation with distant and active contact | Atlas | semi automatized | linear scaling factor applied for 3D atlas deformation to MRI co-registration | Landmark based linear (independent linear scaling factors) registration. Coordinates were then transferred onto figures from an atlas based on the AC–PC line, no normalisation specified | MRI | manual (validated method using glass tube experiment) | description / spatial distribution of contact | **dorsal STN / superior border** |
| **Yokoyama et al. Stereotact Funct Neurosurg. 2006** | 0 | early assessment, bilateral UPDRS-III sub-score with bilateral stimulation | 17 / 27 | 10 bilateral and 7 unilateral | prospective | 7-10 days | not clearly mentioned | relationship between contact location and improvement of the separate subset UPDRS scores | bilateral UDPRS-III sub-score | OFF medication | compared to OFF stimulation OFF medication performed post operatively, just before ON stimulation OFF medication assessment | MER | manual | position of contacts and MER defined dorsal and ventral STN borders in relation to ACPC plan individually | N/A | X rays | manual | relationship between contact location and motor outcome | **dorsal border of the STN** |
| **Tripoliti et al. Movement Disorders. 2008** | 0 | acute testing of pair of contacts with total UPDRS-III, contact location in relation to STN manually determined by an expert | 14 / 28 | bilateral | prospective | mean 13.6 months | pairs tested together | comparison of 2 stimulation sites (inside or outside the STN) | total UPDRS-III | OFF medication | comparison OFF and ON stimulation | MRI | manual | localisation of contact from center of STN in each patient | N/A | MRI | manual | comparison between outside and inside STN | **within STN > above the STN** |
| **Greenhouse et al. Neuropsychologia. 2011** | 0 | acute testing of pair of contacts with total UPDRS-III, assessment done ON medication, co-registration to an atlas for anatomical segmentation, no precision on co-registration method or post fusion verification | 20 / 40 | bilateral | prospective | average 16.95 months | bilateral testing simultaneously | comparison of ventral and dorsal contacts | total UPDRS-III | ON medication | comparison between dorsal and ventral contacts (80 contacts) | Atlas | semi automatized (atlas) | not specified | not specified | post op CT fused with preoperative MR or MER fused with atlas | Method from CT not detailed. MER trajectory diagrams were co-registered to atlas | comparison between ventral and dorsal | **dorsal stimulation > ventral stimulation** |
| **Hilliard et al. Stereotact Funct Neurosurg. 2011** | 0 | insufficient number of patient, assessment of each contacts, ipsilateral stimulation switched OFF, but no precision on medication status, correction of coordinates on each axis, involving the visualisation of the STN/SN, before transposition on an atlas | 10 / 80 (55 for bradykinesia) | bilateral | prospective | average 27.9 months | switched OFF | assessment of each contact | Tremor assessed with specific measurement devices. Bradykinesia assessed using a timed task | not specified | Effect compared with the change produced at the bilateral chronic clinical setting from OFF stimulation | Atlas | semi automatized (atlas) | normalisation of coordinates based on ACPC length 20,5mm (SWA) and landmark based correction for each axis | no co-registration, contacts localised on atlas based on corrected / normalised coordinates | MRI | manual | description / average contact location and spatial distribution of effective contacts | **within STN or adjacent to STN as defined by the S/W atlas** |
| **McNeely et al. J Neurol Neurosurg Psychiatry. 2011** | 1 | ipsilateral STN turned OFF, fiducial based linear co-registration with Mai atlas, using AC, PC and optic chiasma and validated in Videen et al. using the red nucleus, total UPDRS-III but using unilateral stimulation | 23 / 46 | bilateral | prospective | more than 3 months | switched OFF | comparison of ventral and dorsal contacts | total UPDRS-III and gait velocity | OFF medication | comparison of a ventral and a dorsal contact | Atlas | automatized | normalised to common space (Mai atlas) | from Videen at al. fiducial based linear co-registration with Mai atlas, using AC, PC and optic chiasma | CT scan | Manual, as described in Videen et al. | comparison between ventral and dorsal | **dorsal stimulation = ventral stimulation** |
| **Burrows et al. Operative Neurosurgery. 2012** | 0 | insufficient number of patients, time of assessment not reported, assessment performed ON medication, ipsilateral STN not specified | 11 / 42 | bilateral | prospective | not specified | not clearly mentioned, possibly OFF | comparison of contacts within the STN and within the ZI | total and sub-scores of UPDRS-III | ON medication | comparison of STN contact and ZI contact | Atlas | automatized | Patient data normalisation in the atlas space (contacts plotted into common atlas space). See Bardinet E, et al. | non rigid registration, by applying an intensity-based robust multiscale block-matching algorithm (for details, see Appendix in the article by Yelnik et al) | MRI | manual | comparison of contacts within the STN and within the ZI | **ZI only superior to STN for finger taps and rapid alternating movements sub-scores** |
| **Eisenstein et al. ANNALS of Neurology. 2014** | 1 | fiducial based linear co-registration with Mai atlas, using AC, PC and optic chiasma and validated in Videen et al. using the red nucleus, ipsilateral STN switched OFF, robust statistical method | 51 / 90 for UPDRS-III data | bilateral but each side tested separately | prospective | median 8 months | switched OFF | location of active contact, functional atlas | UPDRS-III total and lateralized sub-scores | OFF medication | compared with post-operative OFF DBS | Atlas | automatized | normalised to common space (Mai atlas) | from Videen at al. fiducial based linear co-registration with Mai atlas | CT scan | Manual, as described in Videen et al. | description / spatial distribution of contact and functional atlas with correlation between clinical effect and contact location | **No significant sweet spot after permutation analysis. Improvement in hand velocity dorsal STN/ZI border. Improvement in right hand tremor STN/SN border** |
| **Gourisankar et al. R. Soc. open sci. 2018** | 1 | fiducial based linear co-registration with Mai atlas, using AC, PC and optic chiasma and validated in Videen et al. using the red nucleus, ipsilateral STN status not clearly reported but lateralised assessment, robust statistical method | 74 / 74 (study on the worst side), 148 contact ventral and dorsal | bilateral | prospective | >3months, mean 18.2 months | not clearly mentioned, possibly OFF | comparison of ventral and dorsal contact and functional atlas | lateralized UPDRS-III | OFF medication | OFF medication OFF stimulation | Atlas | automatized | normalised to common space (Mai atlas) | from Videen at al. fiducial based linear co-registration with Mai atlas | CT scan | Manual, as described in Videen et al. | comparison between ventral and dorsal and functional atlas with correlation between clinical effect and contact location | **dorsal STN and ZI in 3D analysis** |

Supplementary table 2: short-term assessment contact-based studies before selection.
